# Supplementary material for: Bifunctional MXene‐Augmented Retinal Progenitor Cell Transplantation for Retinal Degeneration
Source: PubMed Central journal article supplement (PMC10477897; doi:10.1002/advs.202302747), 2023-06-28
Supplement: ADVS-10-2302747-s001.pdf [file ADVS-10-2302747-s001.pdf]

## Supporting Information

for *Adv. Sci.*, DOI 10.1002/adv.202302747

Bifunctional MXene-Augmented Retinal Progenitor Cell Transplantation for Retinal Degeneration

*Zhimin Tang, Yan Liu, Huijing Xiang, Xinyue Dai, Xiaolin Huang, Yahan Ju, Ni Ni, Rui Huang, Huiqin Gao, Jing Zhang, Xianqun Fan, Yun Su\*, Yu Chen\* and Ping Gu\**

Supporting Information

**Bifunctional MXene-Augmented Retinal Progenitor Cell Transplantation for Retinal Degeneration**

*Zhimin Tang, Yan Liu, Huijing Xiang, Xinyue Dai, Xiaolin Huang, Yahan Ju, Ni Ni, Rui Huang, Huiqin Gao, Jing Zhang, Xianqun Fan, Yun Su\*, Yu Chen\*, Ping Gu\**

**Supporting Information includes:**

S1. Supporting Figures S1 ~ S15

S2. Supporting Tables S1 ~ S2

## S1. Supporting Figures S1~S15.

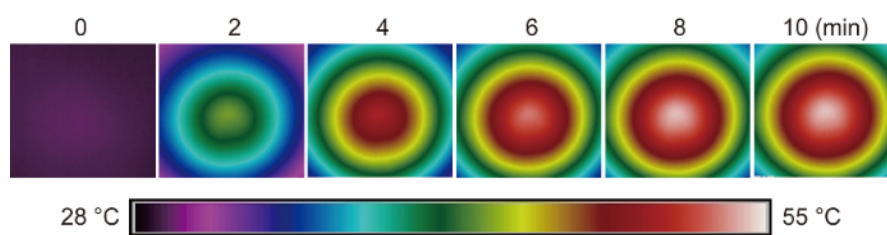

**Figure S1.** Thermal images of Nb<sub>2</sub>C MXene ( $100 \mu\text{g mL}^{-1}$ ) under irradiation by an 808 laser at a power density of  $1.0 \text{ W cm}^{-2}$ .

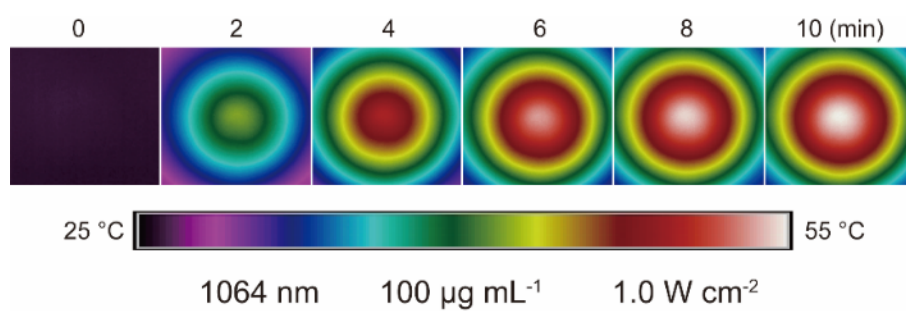

**Figure S2.** Thermal images of Nb<sub>2</sub>C MXene (100 μg mL<sup>-1</sup>) under irradiation by a 1064 laser at a power density of 1.0 W cm<sup>-1</sup>.

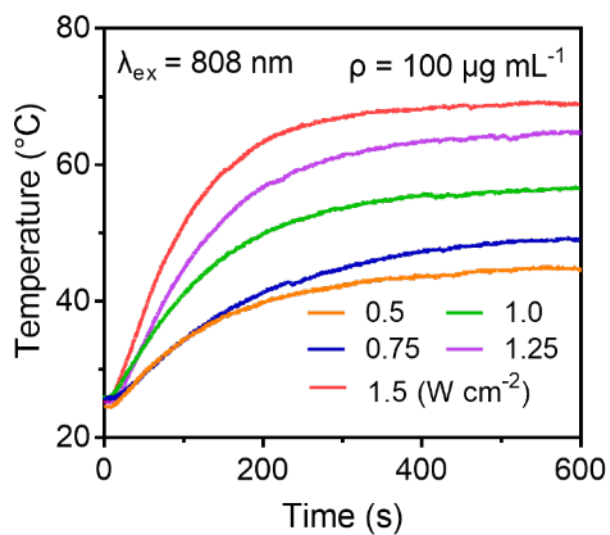

**Figure S3.** Photothermal profile of Nb<sub>2</sub>C MXene (100 µg mL<sup>-1</sup>) under irradiation by an 808 laser at different power densities.

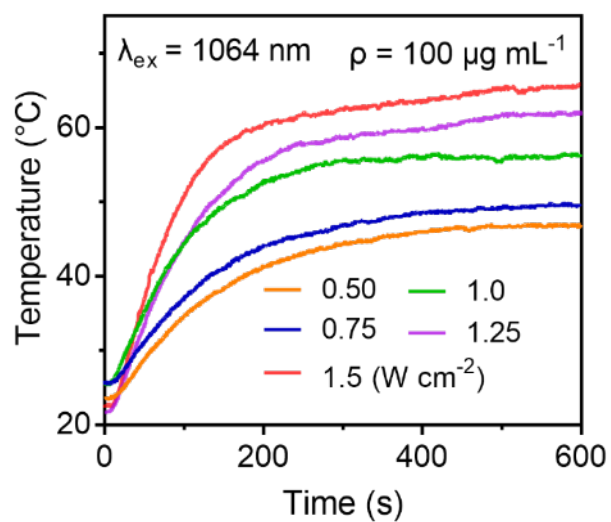

**Figure S4.** Photothermal profile of Nb<sub>2</sub>C MXene (100 µg mL<sup>-1</sup>) under irradiation by a 1064 nm laser at different power densities.

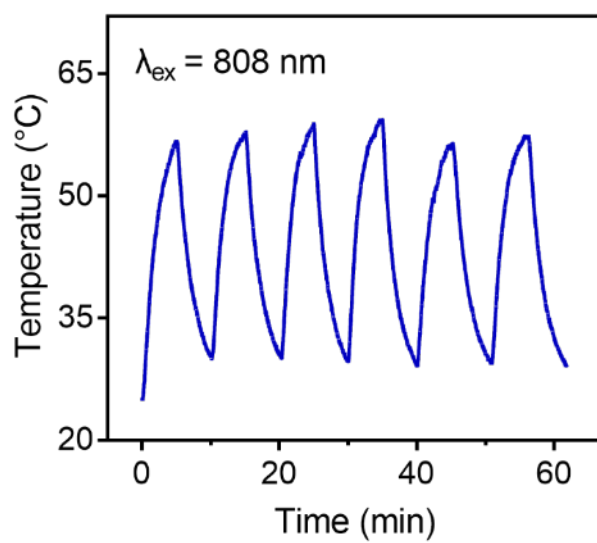

**Figure S5.** Photothermal curves of Nb<sub>2</sub>C aqueous solution for six on/off irradiation cycles by an 808 nm laser (1 W cm<sup>-2</sup>).

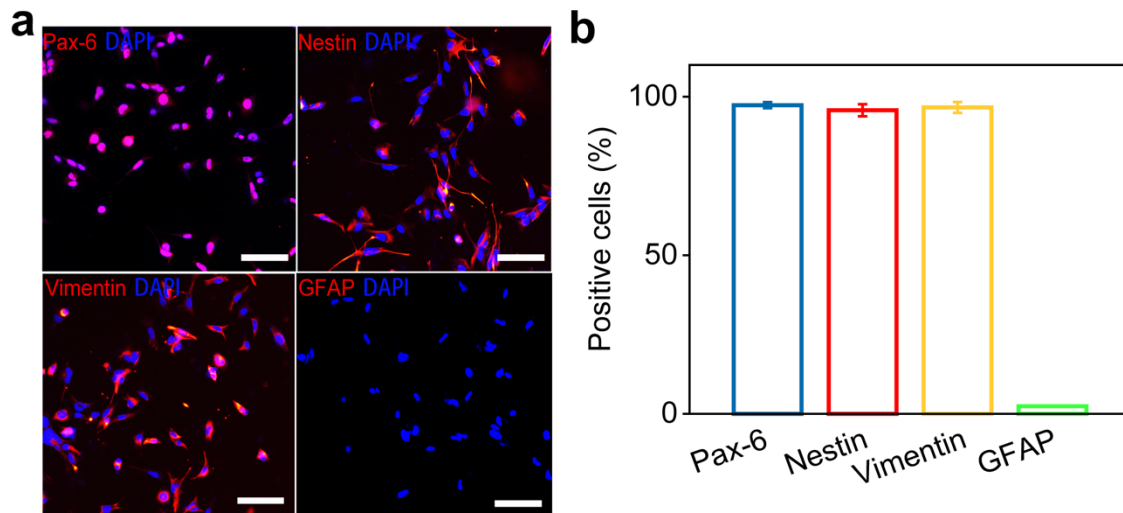

**Figure. S6** Identification of specific markers of RPCs. a) Representative images of Pax-6, Nestin, Vimentin and GFAP-positive cells were taken after immunocytochemistry staining. Scale bars: 50  $\mu\text{m}$ . b) Quantitative analysis of the positive ratio of Pax-6-, Nestin-, Vimentin-, and GFAP-expressed cells.  $n=6$  independent experiments, data presented as mean  $\pm$  SD.



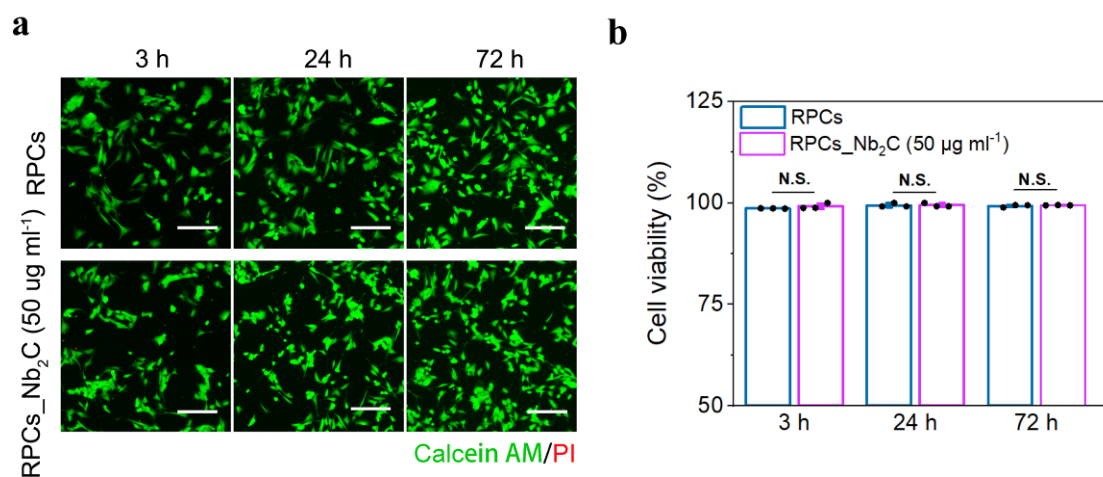

**Figure S7.** Effects of 2D Nb<sub>2</sub>C MXene (50  $\mu\text{g ml}^{-1}$ ) on cell viability by a) live/dead staining after treatment for 3 h, 24 h and 72 h, and b) the survived cells were further calculated using Image J software. Living cells (green): calcein AM staining, dead cells (red): PI staining. Scale bars: 100  $\mu\text{m}$ .  $n=3$ , not significant (N.S.)  $> 0.05$  by two-tailed Student's  $t$ -test, data presented as mean  $\pm$  SD.

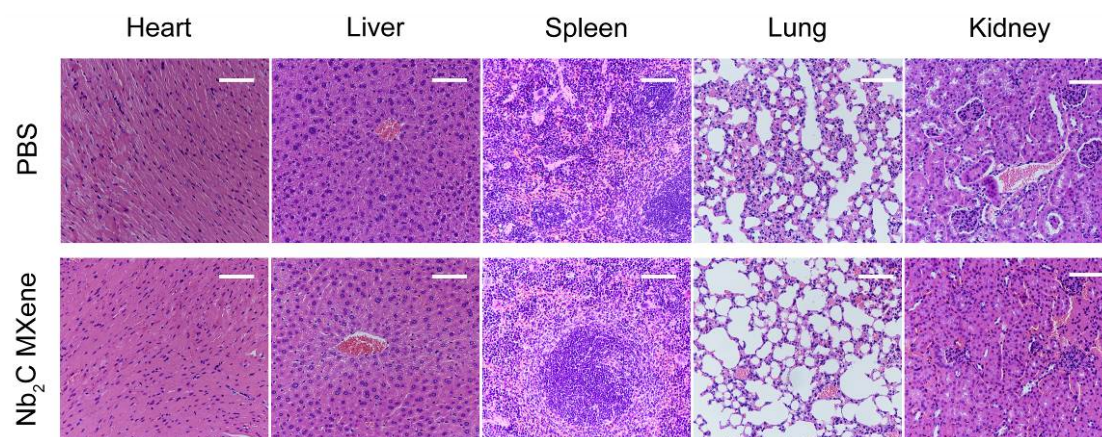

**Figure S8.** Representative H&E staining images of organic tissues, including heart, liver, spleen, lung and kidney were taken in Nb<sub>2</sub>C MXene-injected healthy mice 2-weeks post-administration. Scale bars: 100 μm.

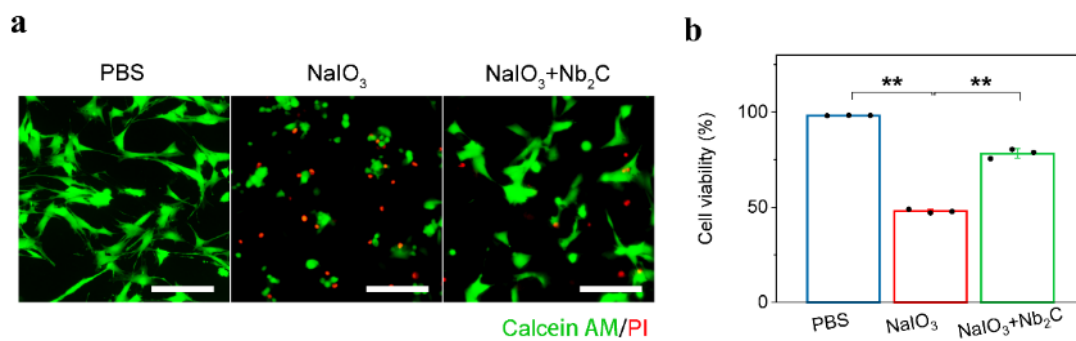

**Figure S9.** RPCs treated with PBS,  $\text{NaIO}_3$  (10 mM), and  $\text{NaIO}_3 + \text{Nb}_2\text{C}$  under differentiation condition for 24 h, then a) representative live/dead RPCs were imaged, and b) the survived cells were further calculated using Image J software. Scale bars: 100  $\mu\text{m}$ .  $n=3$ , one-way ANOVA with Bonferroni correction,  $**P < 0.01$ , data presented as mean  $\pm$  SD.

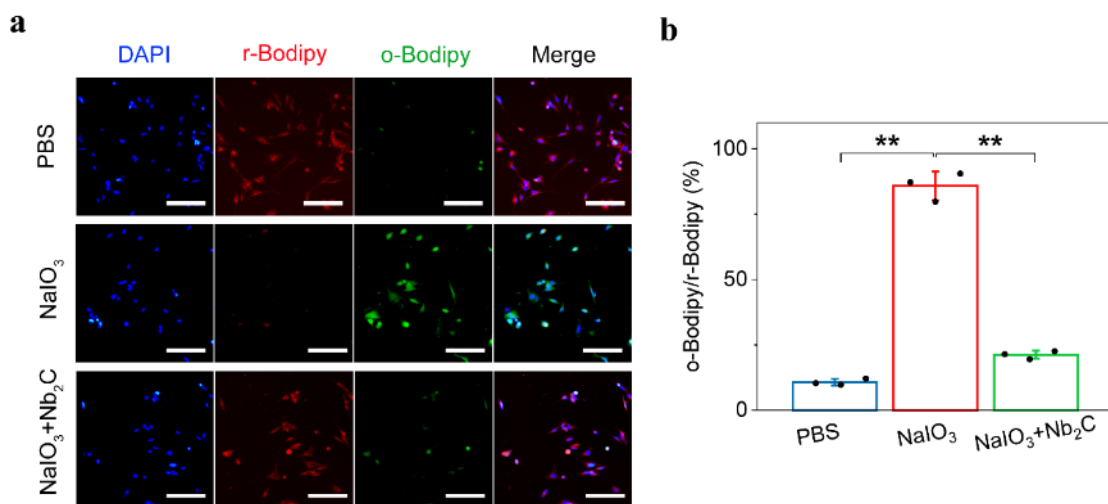

**Figure S10.** RPCs treated with PBS, NaIO<sub>3</sub>, and NaIO<sub>3</sub> + Nb<sub>2</sub>C MXene under differentiation condition for 24 h, then a) lipid peroxidation in RPCs was determined using C11-BODIPY probe and b) relative fluorescence intensity of oxidized-Bodipy was further calculated. Blue: cell nuclei, red: reduced-Bodipy, green: oxidized-Bodipy. Scale bars: 100  $\mu$ m. n=3, one-way ANOVA with Bonferroni correction, \*\*P < 0.01, data presented as mean  $\pm$  SD.

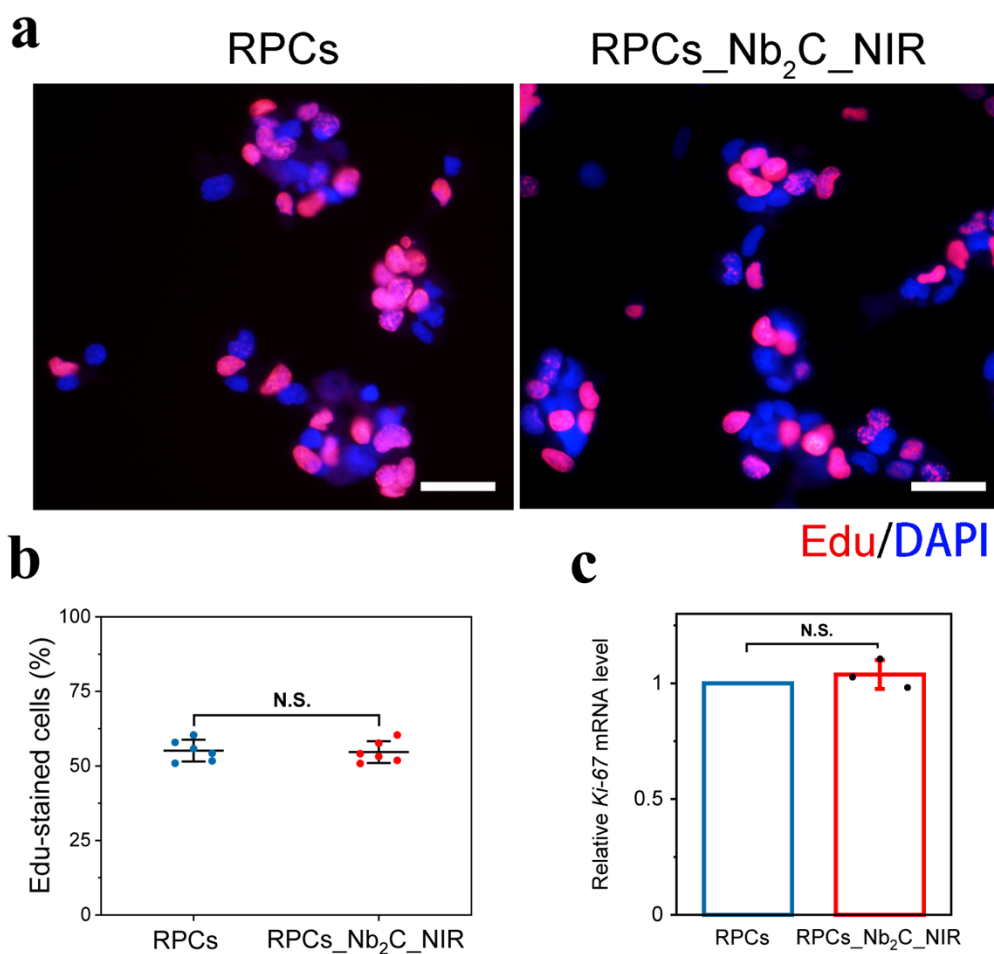

**Figure S11.** After 3 days of Nb<sub>2</sub>C\_NIR treatment under proliferation culture, a) proliferation capability of RPCs was subject to Edu-staining assay, and b) Edu-positive cell percentage was calculated by Image J software. Scale bars: 50  $\mu$ m. n=6, not significant (N.S.) > 0.05 by two-tailed Student's t-test. c) Gene expression level of Ki-67 (a cell proliferation marker) was additionally detected. n=3, not significant (N.S.) > 0.05 by two-tailed Student's t-test, data presented as mean  $\pm$  SD.

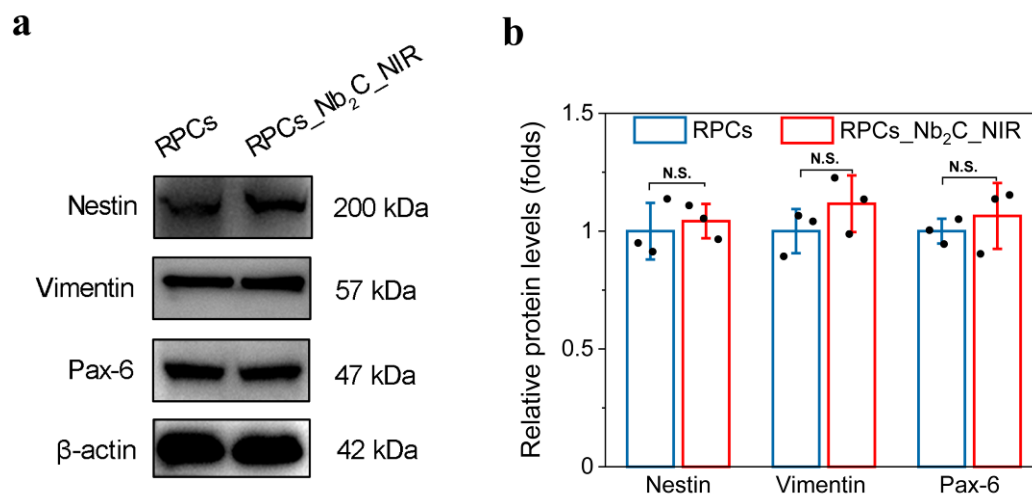

**Figure S12.** After 3 days of Nb<sub>2</sub>C\_NIR treatment under proliferation culture, stemness of RPCs was evaluated by detecting a) the protein expression levels and d) quantitative analysis of retinal progenitor-related markers (Nestin, Vimentin and Pax-6). n=3, not significant (N.S.) > 0.05 by two-tailed Student's t-test, data presented as mean  $\pm$  SD.

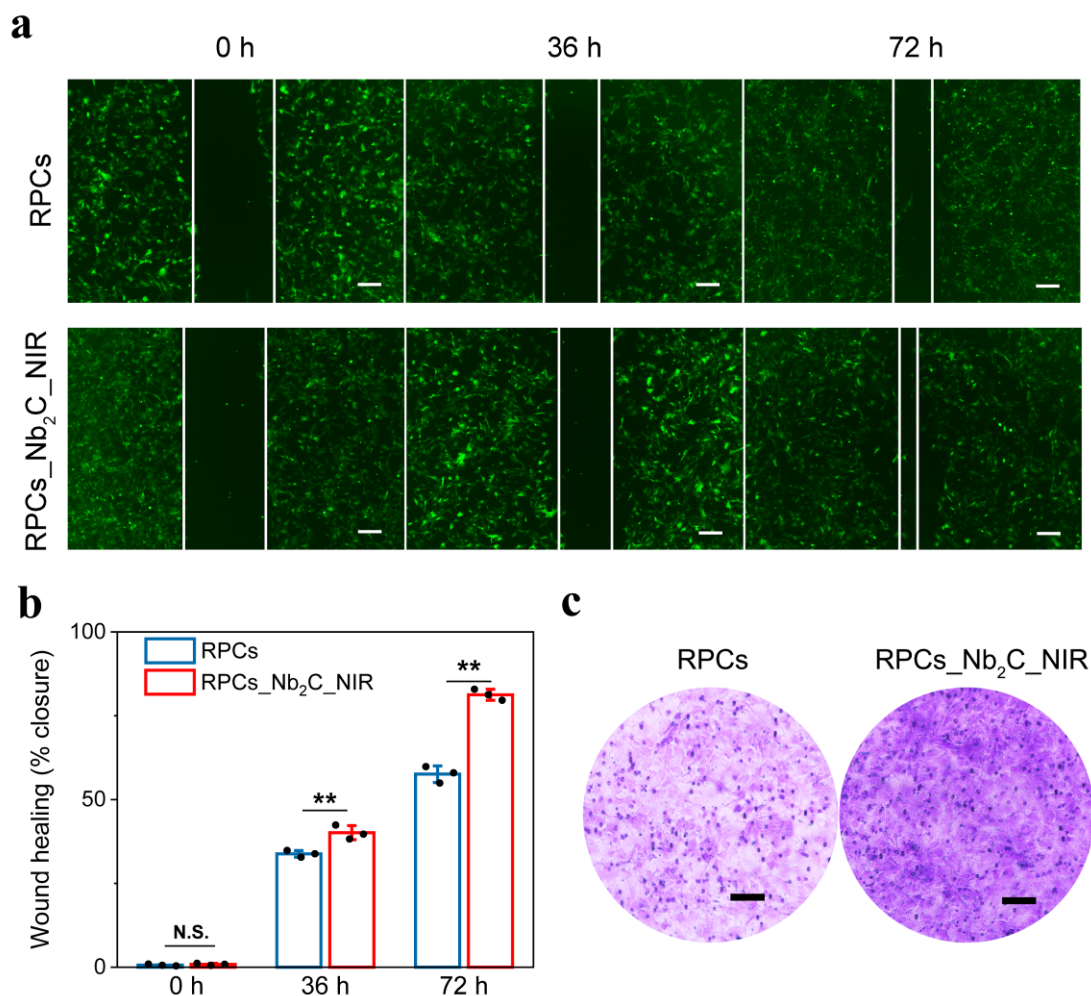

**Figure S13.** a) Representative imaging and b) quantitative analysis of cell horizontal migration across the wound areas (indicated between two white lines) after scratch for 36 h and 72 h. Scale bars: 100  $\mu$ m.  $n=3$ ,  $**P < 0.01$ , not significant (N.S.)  $> 0.05$  by two-tailed Student's  $t$ -test. c) Transwell assay demonstrated the vertical migration of Nb<sub>2</sub>C\_NIR treated RPCs by 1% crystal violet staining. Scale bars: 100  $\mu$ m, data presented as mean  $\pm$  SD.

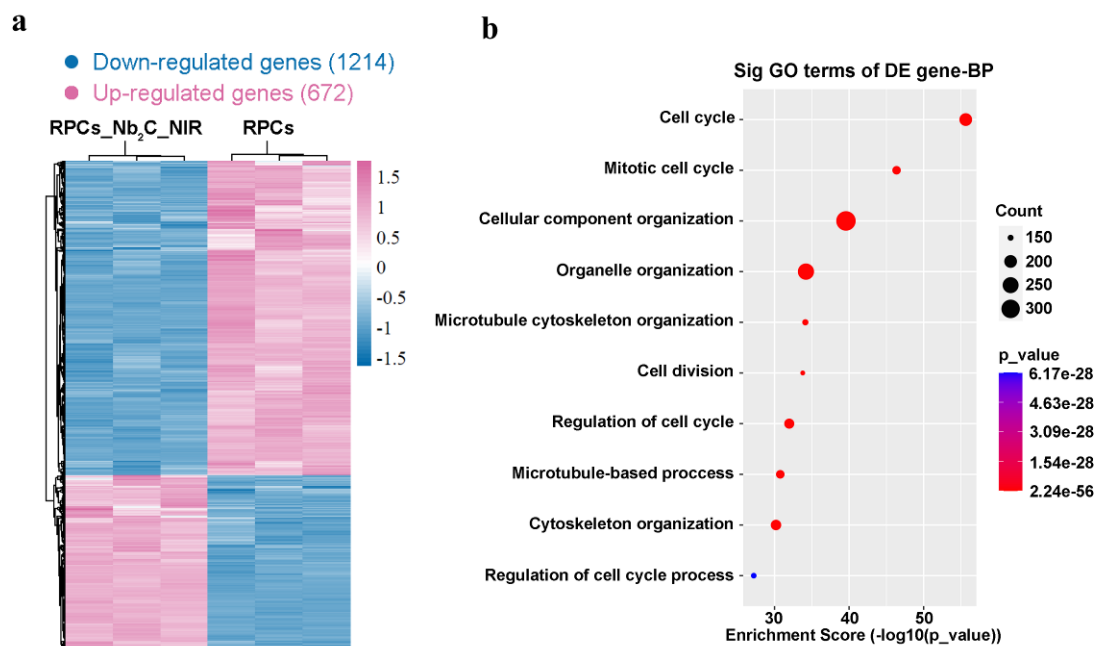

**Figure S14.** a) Heatmap showed differentially expressed genes across Nb<sub>2</sub>C\_NIR treated RPCs (RPCs\_Nb<sub>2</sub>C\_NIR) against PBS-treated RPCs (RPCs). Red: upregulated genes, blue: downregulated genes. b) Top ten of significant GO terms by enrichment analysis of differentially downregulated genes involving biological process.



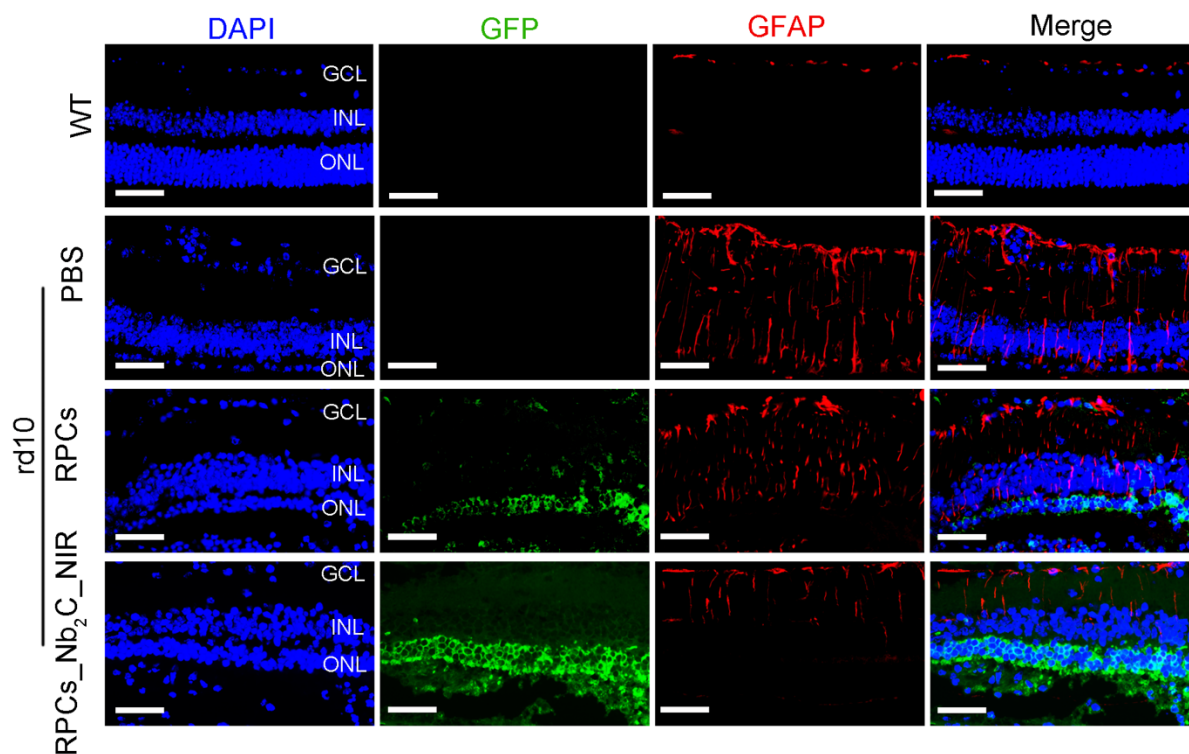

**Figure. S15** Immunostaining of GFAP in WT and rd10 retina 8 weeks after transplantation of PBS, GFP<sup>+</sup> RPCs or GFP<sup>+</sup> RPCs\_Nb<sub>2</sub>C\_NIR. Scale bars: 50  $\mu$ m. n=6 independent experiments. GFAP (red): glial fibrillary acidic protein. WT: wild type. ONL: outer nuclear layer, INL: inner nuclear layer, GCL: ganglion cell layer.

## S2. Supporting Tables S1~S2

Table S1. Primer sequences for qPCR analysis

| Genes             | Accession number | Forward (5-3' )        | Reverse (5-3' )       | Annealing temperature (°C) | Product size (base pairs) |
|-------------------|------------------|------------------------|-----------------------|----------------------------|---------------------------|
| Ki-67             | X82786           | cagtactcgggaatgcagcaa  | cagtcttcaggggctctgtc  | 60                         | 170                       |
| IL-6              | NM_031168.1      | aggagtggctaaggaccaaga  | ataacgcactaggttgccga  | 60                         | 100                       |
| MCP-1             | NM_011333.3      | acctgctgctactcattcacc  | attccttctggggtcagca   | 60                         | 148                       |
| Caspase-3         | NM_004346        | catggaagcgaatcaatggact | ctgtaccagaccgagatgtca | 60                         | 139                       |
| $\beta$ 3-tubulin | NM_023279        | cgagacctactgcatcgaca   | cattgagctgaccagggaaat | 60                         | 152                       |
| Rhodopsin         | NM_145383        | tcaccaccacctctacaca    | tgatccaggtgaagaccaca  | 60                         | 216                       |
| PKC- $\alpha$     | NM_011101        | cccattccagaaggagatga   | ttctgtcagcaagcatcac   | 60                         | 212                       |
| GFAP              | NM_010277        | agaaaaccgcatcaccattc   | tcacatcaccacgtccttgt  | 60                         | 184                       |
| $\beta$ -actin    | NM_007393        | agccatgtacgtagccatcc   | ctctcagctgtgggtgaa    | 60                         | 152                       |

**Table S2.** Primary antibodies used in western blot, immunocytochemistry (ICC) and/or immunofluorescence analysis

| Antibodies        | Animal | Vendor                    | Western blot | ICC         | Immunofluorescence |
|-------------------|--------|---------------------------|--------------|-------------|--------------------|
| $\beta$ -actin    | Mouse  | Proteintech               | Yes (1:5000) | No          | No                 |
| PKC- $\alpha$     | Rabbit | Cell Signaling Technology | Yes (1:800)  | Yes (1:200) | Yes (1:200)        |
| $\beta$ 3-tubulin | Rabbit | Sigma-Aldrich             | Yes (1:800)  | Yes (1:200) | No                 |
| GFAP              | Mouse  | Sigma-Aldrich             | Yes (1:800)  | Yes (1:200) | Yes (1:200)        |
| Rhodopsin         | Mouse  | Sigma-Aldrich             | Yes (1:800)  | Yes (1:200) | Yes (1:200)        |
| Recoverin         | Rabbit | Proteintech               | No           | No          | Yes (1:200)        |
| RBPMS             | Rabbit | Proteintech               | No           | No          | Yes (1:200)        |
| Caspase-3         | Mouse  | Proteintech               | Yes (1:800)  | No          | No                 |
| MCP-1             | Mouse  | Santa Cruz Biotechnology  | Yes (1:800)  | No          | No                 |
| IL-6              | Rabbit | Abcam                     | Yes (1:800)  | No          | No                 |
| CD68              | Rabbit | Abcam                     | No           | No          | No                 |
| Nestin            | Rabbit | Sigma-Aldrich             | Yes (1:800)  | Yes (1:200) | No                 |
| Vimentin          | Rabbit | Sigma-Aldrich             | Yes (1:800)  | Yes (1:200) | No                 |
| Pax-6             | Rabbit | Sigma-Aldrich             | Yes (1:800)  | Yes (1:200) | No                 |
| p-Erk             | Rabbit | Proteintech               | Yes (1:800)  | No          | No                 |
| Erk               | Mouse  | Proteintech               | Yes (1:800)  | No          | No                 |
| p-Akt             | Rabbit | Proteintech               | Yes (1:800)  | No          | No                 |
| Akt               | Rabbit | Abcam                     | Yes (1:800)  | No          | No                 |
